# Supplementary material
Source: Springer Nature journal article supplement (https://www.springerprofessional.de/resource/supplementary/40294_2012_8_MOESM6_ESM.pdf/11899552)

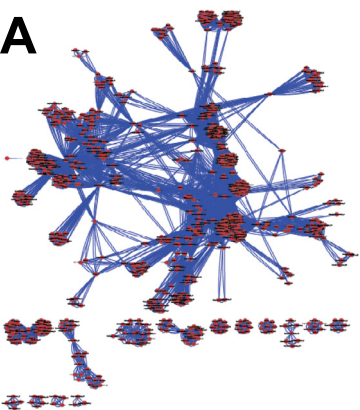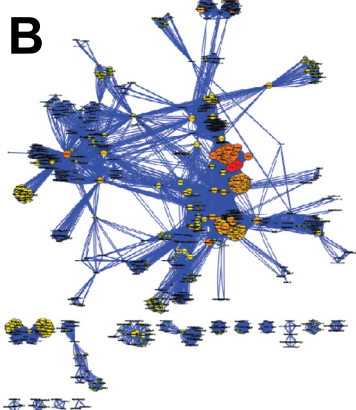

**C** Degree Distribution (log-log scale)

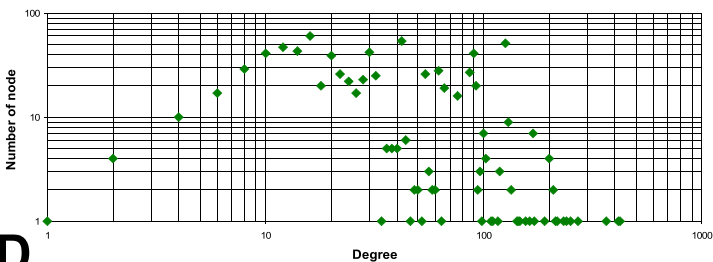

**D** Clustering coefficient distribution (linear-log scale)

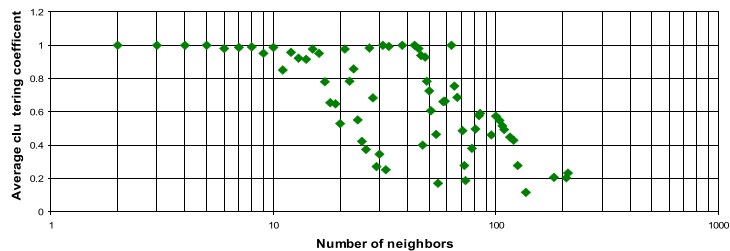

**E** Shortest path length distribution

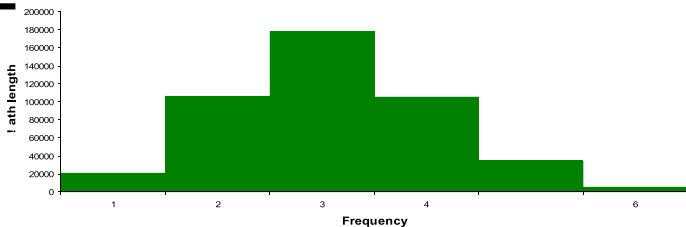

Supplement: MOESM6 [file 11899552]
